# Supplementary material for: Research collaboration for a knowledge-based economy: towards a conceptual framework
Source: Springer Nature journal article supplement (doi:10.1186/s40604-018-0049-5), 2018-04-03
Supplement: MOESM1 [file 15587028]

Mavis Serwah Benneh Mensah

**Abstract:**

A knowledge-based economy thrives on constructed advantages generated through well-planned recursive interactions among key actors in the economy. Using a desk review, this paper advances theoretical and conceptual arguments in support of research collaboration as a critical and viable medium for the conduct of research and innovation geared towards economic growth and development. We propose a conceptual framework to guide future research on the determinants and the dynamics of research collaboration as well as the use of collaborative research output in innovation. The framework, which can be modeled, is recommended for descriptive and explanatory research aimed at obtaining first-hand information for policy interventions that seek to advance the knowledge-based economy, through research collaboration.

التعاون في مجال البحوث لإقامة اقتصاد قائم على المعرفة: نحو إطار مفاهيمي  
الكاتب (ة) : Mavis Serwah و Benneh Mensah

**ملخص**

يتطور الاقتصاد القائم على المعرفة من خلال مزايا التخطيط المحكم لتفاعلات المتكررة بين الجهات الرئيسية الفاعلة في الاقتصاد. تقدم هذه الورقة أدلة نظرية ومفاهيمية تدعم أهمية التعاون عند إجراء البحوث واعتباره وسيلة أساسية وحيوية لانجاز البحوث والابتكار الموجهة نحو النمو الاقتصادي والتنمية. كما نقترح إطارا نظريا لتوجيه البحوث في المستقبل نحو الديناميكيات و العوامل المحددة للتعاون في البحوث وكذلك نحو استخدام نتائج البحوث التعاونية في مجال الابتكار. البحث الذي يوصى به و الذي يمكن انجازه في إطار وصفي وتفسيري هو البحث الذي يهدف إلى الحصول على معلومات مباشرة حول السياسة التي ترمى إلى تعزيز الاقتصاد القائم على المعرفة، من خلال التعاون في مجال البحوث.
